# Supplementary material for: Oxygen vacancy-enriched MoO3−x nanobelts for asymmetric supercapacitors with excellent room/low temperature performance
Source: Royal Society of Chemistry journal article supplement (doi:10.1039/c9ta03471d), 2019-01-01
Supplement: c9ta03471d1.pdf [file c9ta03471d1.pdf]

## Supplementary materials

### Oxygen Vacancies-enriched MoO<sub>3-x</sub> Nanobelts for Asymmetric Supercapacitors with Excellent Room/Low Temperature Performance

Qi-Long Wu,<sup>ab</sup> Shi-Xi Zhao,<sup>\*a</sup> Le Yu,<sup>ab</sup> Xiao-Xiao Zheng,<sup>ab</sup> Yi-Feng Wang,<sup>ab</sup> Lü-Qiang Yu,<sup>ab</sup>  
Ce-Wen Nan<sup>b</sup> and Guozhong Cao<sup>\*c</sup>

<sup>a</sup>Graduate School at Shenzhen, Tsinghua University, Shenzhen, 518055, China.

<sup>b</sup>School of Materials Science and Engineering, Tsinghua University, Beijing, 100084, China

<sup>c</sup>Department of Materials Science and Engineering, University of Washington, Seattle, WA 98195, USA.

\*Corresponding author: Email: [zhaosx@sz.tsinghua.edu.cn](mailto:zhaosx@sz.tsinghua.edu.cn) (S.X.Zhao); E-mail: [gzc@uw.edu](mailto:gzc@uw.edu)

#### Relevant formulas:

The relevant calculation formulas for specific capacitance ( $C_s$  for single electrodes,  $C$  for asymmetric supercapacitor), energy density ( $E$ ) and power density ( $P$ ) are listed as follows:

$$C_s = \frac{I \Delta V_1}{m \Delta t_1} \quad (1)$$

$$C = \frac{I \Delta V_2}{m \Delta t_2} \quad (2)$$

$$E = \frac{C (\Delta V_2)^2}{2 \times 3.6} \quad (3)$$

$$P = \frac{3600 E}{\Delta t_2} \quad (4)$$

Where  $C_s$  and  $C$  (F g<sup>-1</sup>) are the specific capacitance of single electrode and asymmetric supercapacitor respectively.  $I$  (A) is current.  $m$  (g) is the mass of active materials.  $\Delta V_1$  (V) and  $\Delta V_2$  (V) are the voltage windows of single electrode and asymmetric supercapacitor without IR drop, respectively.  $E$  (Wh kg<sup>-1</sup>) is energy density and  $P$  (W kg<sup>-1</sup>) is power density of asymmetric supercapacitor.

#### Figures:

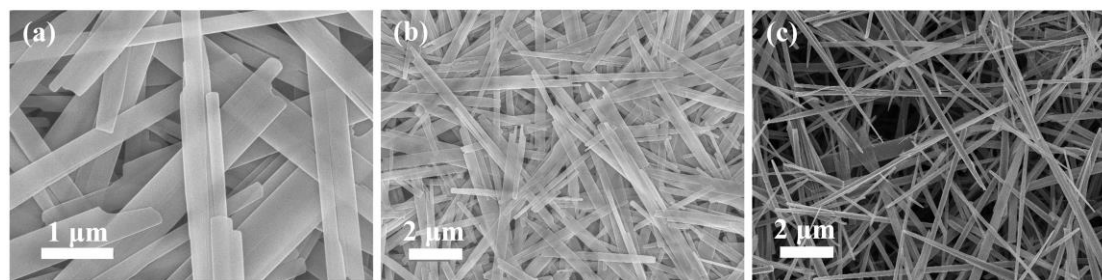

**Fig. S1** SEM images of MoO<sub>3</sub> nanobelts with different magnifications (a, b) and MoO<sub>3-x</sub> nanobelts (c).

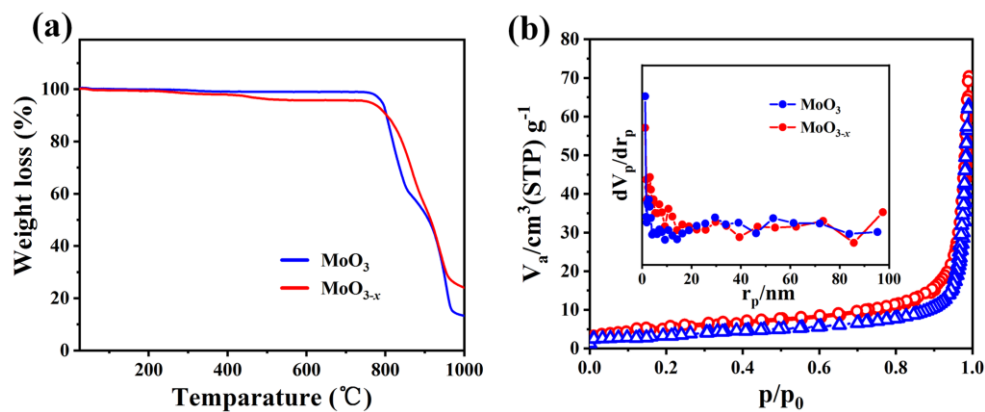

Fig. S2 TG (a) and BET (b) test results of  $\text{MoO}_3$  and  $\text{MoO}_{3-x}$  nanobelts.

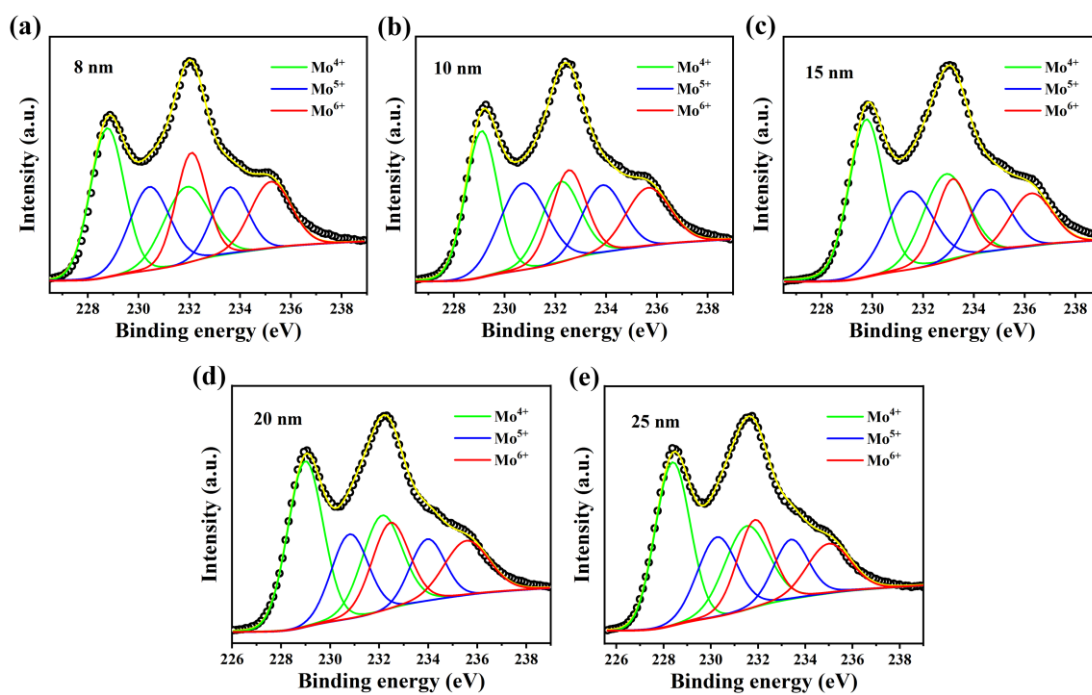

Fig. S3 XPS spectra of  $\text{MoO}_{3-x}$  nanobelts in different depth from 8 to 25 nm.

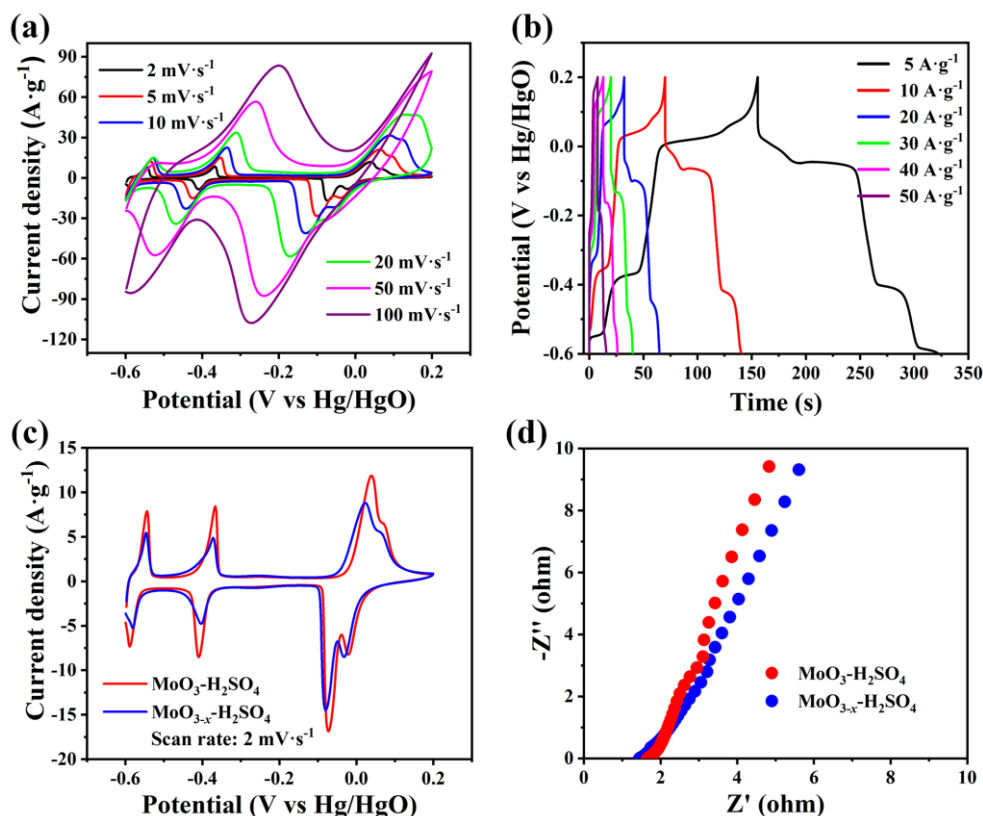

Fig. S4 (a) and (b) CV and GCD curves of  $\text{MoO}_3$  nanobelts electrode tested in  $\text{H}_2\text{SO}_4$ ; Comparison of  $\text{MoO}_3$  and  $\text{MoO}_{3-x}$  nanobelts electrodes: (c) CV curves and (d) EIS plots.

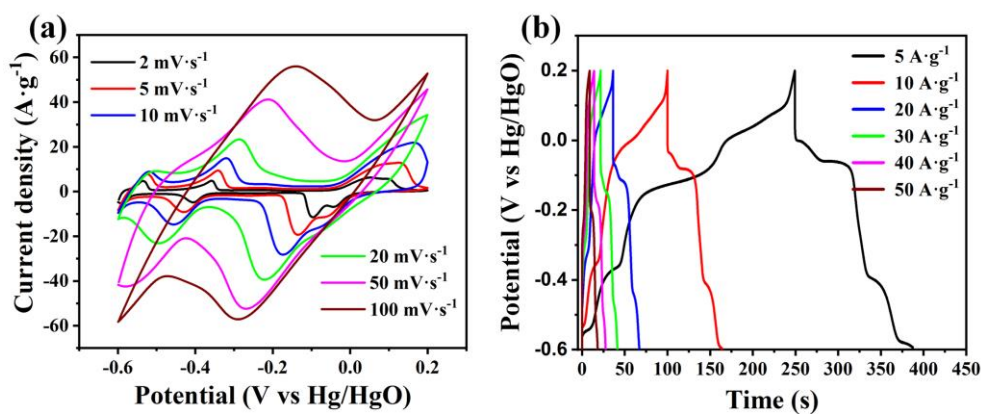

Fig. S5 CV and GCD curves of  $\text{MoO}_{3-x}$  nanobelts electrode tested at  $0^\circ\text{C}$ .

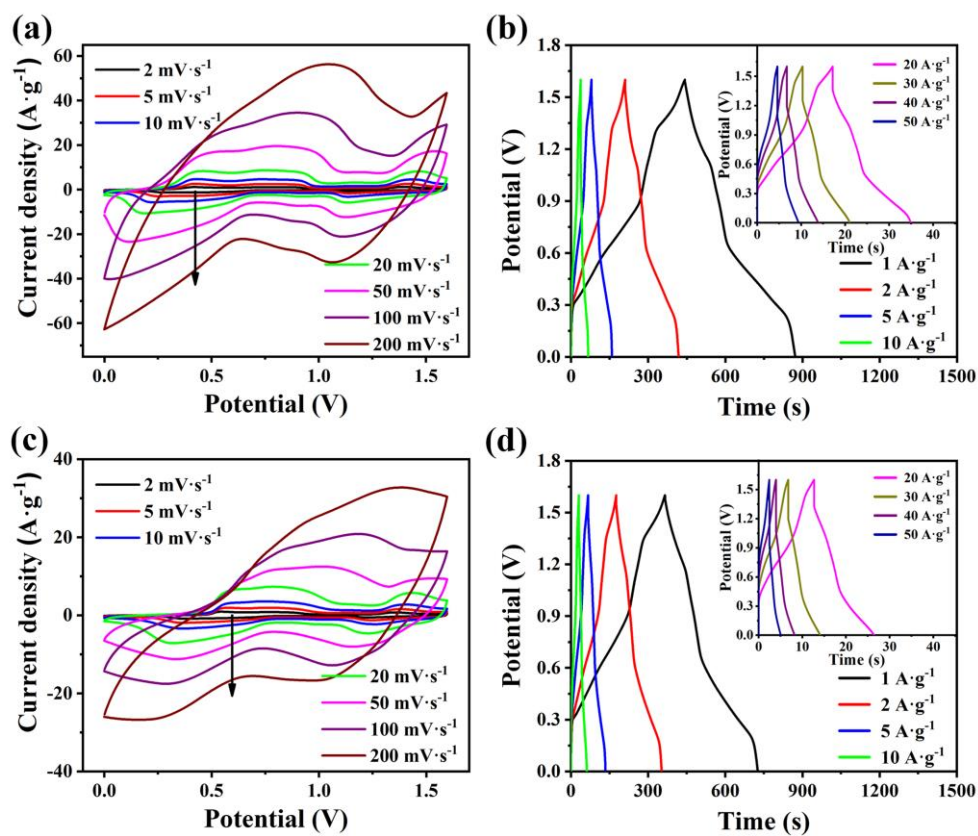

Fig. S6 CV and GCD curves of AC//MoO<sub>3-x</sub> tested at 0°C (a, b) and -25°C (c, d).

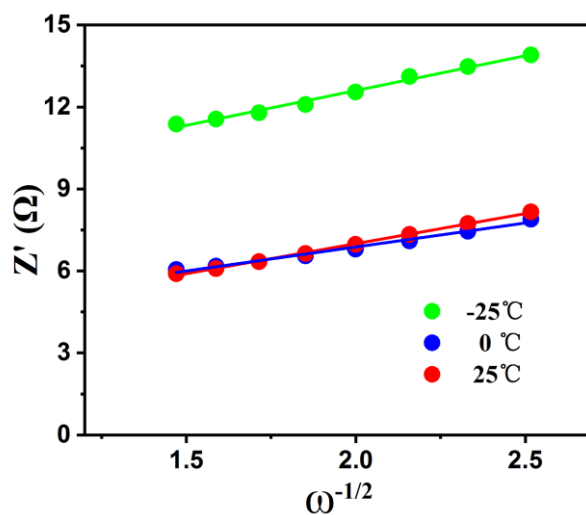

Fig. S7 Linear relationship between  $z'$  and  $\omega^{-1/2}$  in low frequency region.

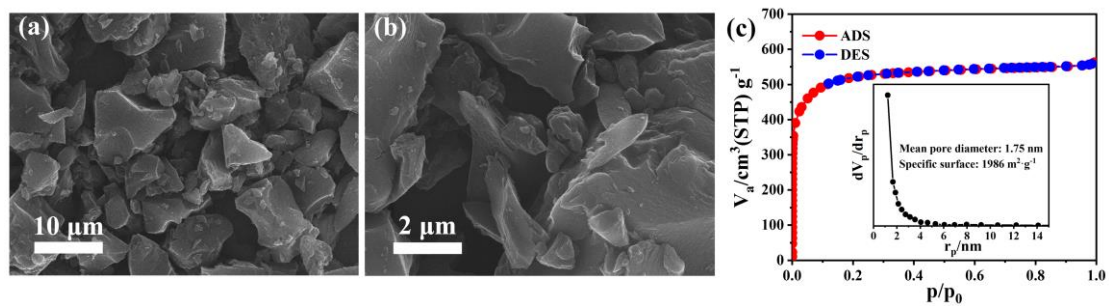

**Fig. S8** (a) and (b) SEM images of AC with different magnifications; (c) BET test result of AC.
